# Supplementary material
Source: Springer Nature journal article supplement (https://www.springermedizin.de/resource/supplementary/13046_2009_154_MOESM1_ESM.pdf/9661748)

**Control**

**Crosslinked  $\beta 4$   
Integrin**

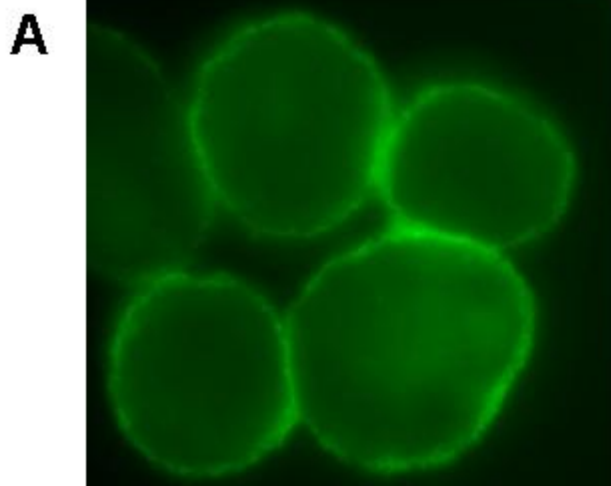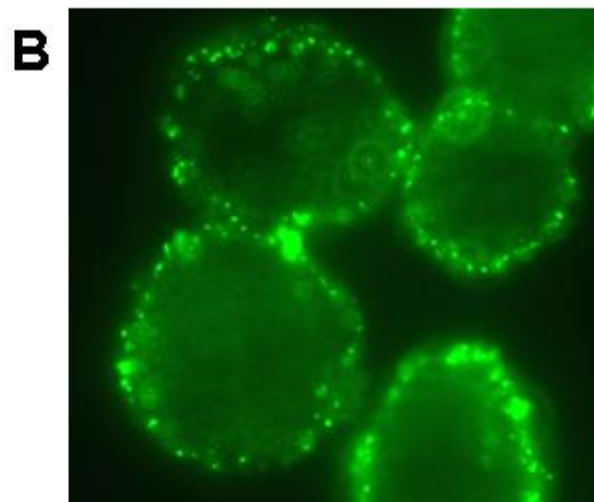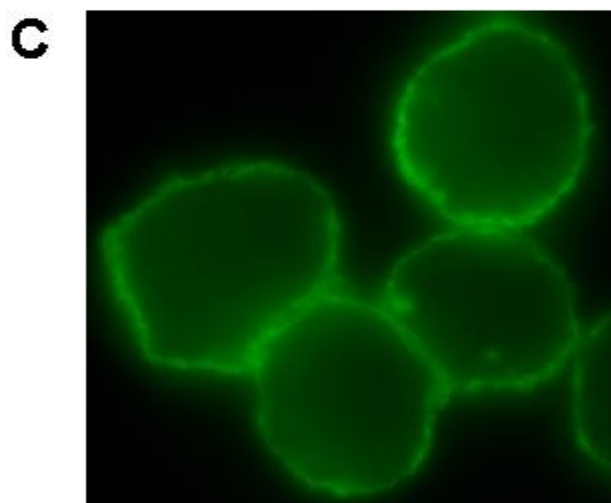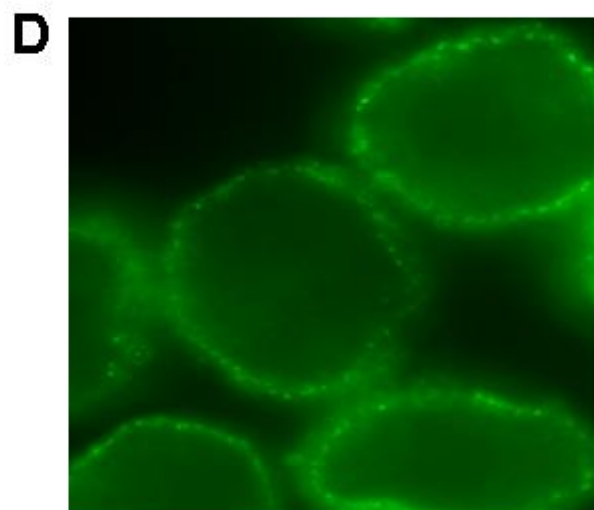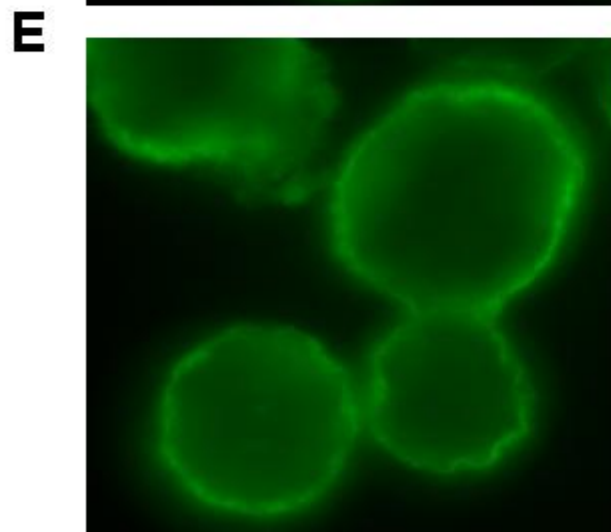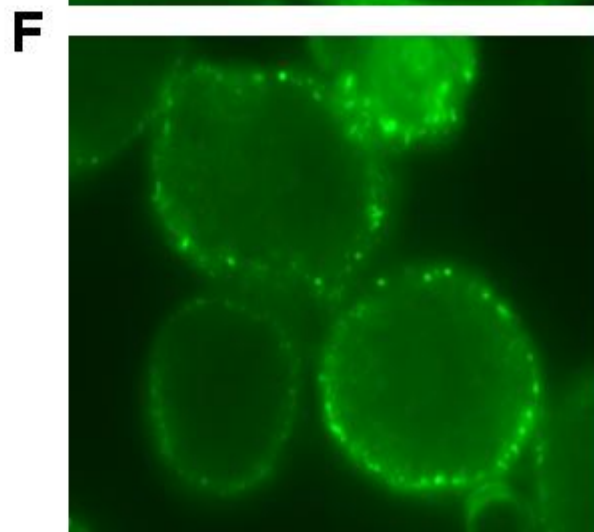

Supplement: MOESM1 [file 9661748]
